# Supplementary material
Source: publisher figshare collection journal article supplement (https://rs.figshare.com/ndownloader/files/14701298)
Supplement: Supplementary file 1 [file 14701298]

Hybridization between sympatric hammerhead sharks in the western North Atlantic Ocean
AM Barker, DH Adams, WB Driggers III, BS Frazier, DS Portnoy
NewHyb_Group	Ind	P1	P2
Scall	CC_001-12	1	0
Scall	CC_003-12	1	0
Scall	CC_004-12	1	0
Scall	CC_005-12_rep	1	0
Scall	CC_006-12	1	0
Scall	CC_007-12	1	0
Scall	CC_009-12	1	0
Scall	CC_010-12	1	0
Scall	CC_011-12	1	0
Scall	CC_012-12	1	0
Scall	CC_013-12	1	0
Scall	CC_014-12	1	0
Scall	CC_016-12	1	0
Scall	CC_017-12	1	0
Scall	CC_018-12	1	0
Scall	CC_019-12	1	0
Scall	CC_020-12	1	0
Scall	CC_021-12	1	0
Scall	CC_022-12	0.999	0.001
Scall	CC_023-12	1	0
Scall	CC_025-12	1	0
Scall	CC_026-12	1	0
Scall	CC_027-12	1	0
Scall	CC_028-12	1	0
Scall	CC_029-12	1	0
Scall	CC_030-12	0.999	0.001
Scall	CC_032-12	0.984	0.016
Scall	CC_034-12	1	0
Scall	CC_037-12	1	0
Scall	CC_063-12	0.993	0.007
Scall	CC_064-12	1	0
Scall	CC_065-12	0.999	0.001
Scall	CC_066-13	1	0
Scall	CC_068-13	0.994	0.006
Scall	CC_069-13	1	0
Scall	CC_070-13	1	0
Scall	CC_071-13	1	0
Scall	CC_072-13	1	0
Scall	CC_073-13	1	0
Scall	CC_074-13	1	0
Scall	CC_076-13	1	0
Scall	CC_077-13	1	0
Scall	CC_078-13	0.996	0.004
Scall	CC_079-13	1	0
Scall	CC_080-13	0.991	0.009
Scall	CC_083-13	0.999	0.001
Scall	CC_087-13	0.982	0.018
Scall	CC_090-13	1	0
Scall	CC_091-13	1	0
Scall	CC_092-13	1	0
Scall	CC_093-13	0.9938	0.0062
Scall	CC_095-13	1	0
Scall	CC_096-13	1	0
Scall	CC_100-13	0.997	0.003
Scall	CC_102-14	1	0
Scall	CC_103-14	0.973	0.027
Scall	CC_104-14	1	0
Scall	CC_105-14	1	0
Scall	CC_108-14	1	0
Scall	CC_109-14	0.997	0.003
Scall	CC_110-14	1	0
Scall	CC_111-14	1	0
Scall	CC_112-14	0.999	0.001
Scall	CC_113-14	1	0
Scall	CC_114-14	1	0
Scall	CC_116-14	0.996	0.004
Scall	CC_117-14	0.998	0.002
Scall	CC_118-14	0.995	0.005
Scall	CC_119-14	1	0
Scall	CC_120-14	0.998	0.002
Scall	CC_121-14	1	0
Scall	CC_122-14	1	0
Scall	CC_123-14	1	0
Scall	CC_124-14	1	0
Scall	CC_125-14	0.998	0.002
Scall	CC_152-14	1	0
Scall	CC_153-14	1	0
Scall	CC_154-14	1	0
Scall	CC_156-14	1	0
Scall	CC_157-14	1	0
Scall	CC_158-14	1	0
Scall	CC_161-14	1	0
Scall	CC_162-14	1	0
Scall	CC_163-14	1	0
Scall	CC_164-14	1	0
Scall	CC_165-14	1	0
Scall	CC_166-14	1	0
Scall	CC_171-14	1	0
Scall	CC_205-14	1	0
Scall	CC_206-14	1	0
Scall	CC_281-15	1	0
Scall	CC_282-16	1	0
Scall	CC_283-16	1	0
Scall	CC_284-16	1	0
Scall	CC_285-16	1	0
Scall	CC_288-16	1	0
Scall	CC_292-16	1	0
Scall	CC_295-16	1	0
Scall	CC_297-16	1	0
Scall	CC_298-16	1	0
Scall	CG_008-15	1	0
Scall	CG_011-16	1	0
Scall	CG_012-16	1	0
Scall	CG_014-16	0.998	0.002
Scall	CG_025-16	1	0
Scall	CG_026-16	1	0
Scall	CG_027-16	1	0
Scall	CG_028-16	1	0
Scall	CG_029-16	1	0
Scall	CG_030-16	1	0
Scall	CG_031-16	1	0
Scall	CG_032-16	1	0
Scall	CG_033-16	1	0
Scall	CG_034-16	1	0
Scall	CG_035-16	1	0
Scall	CG_036-16	0.999	0.001
Scall	CG_037-17	1	0
Scall	CG_038-17	1	0
Scall	GA_001-14	1	0
Scall	GA_003-14	1	0
Scall	GA_004-15	1	0
Scall	GA_005-15	1	0
Scall	GA_008-15	0.998	0.002
Scall	GA_009-15	0.996	0.004
Scall	GA_012-16	1	0
Scall	GA_013-16	1	0
Scall	GA_016-16_rep	1	0
Scall	GA_028-16	0.996	0.004
Scall	GA_029-16	1	0
Scall	GA_031-16	1	0
Scall	GA_032-16	1	0
Scall	GA_038-16	1	0
Scall	GA_039-16	1	0
Scall	GA_041-16	1	0
Scall	GA_048-16	1	0
Scall	GA_053-17	0.994	0.006
Scall	GA_054-17	1	0
Scall	GA_060-17	1	0
Scall	GA_061-17	1	0
Scall	GA_062-17	1	0
Scall	GA_063-17	1	0
Scall	GA_064-17	1	0
Scall	GA_066-17	1	0
Scall	GA_067-17	1	0
Scall	GA_068-17	1	0
Scall	GA_069-17	1	0
Scall	GA_071-17	1	0
Scall	GA_072-17	1	0
Scall	NC_001-15	1	0
Scall	NC_002-15	1	0
Scall	NC_006-15	1	0
Scall	NF_001-10	1	0
Scall	NF_002-10	1	0
Scall	NF_003-10	1	0
Scall	NF_006-10	1	0
Scall	NF_007-10	1	0
Scall	NF_008-10	1	0
Scall	NF_009-10	0.998	0.002
Scall	NF_010-10	0.999	0.001
Scall	NF_011-10	1	0
Scall	NF_012-10	1	0
Scall	NF_013-10	1	0
Scall	NF_014-10	1	0
Scall	NF_015-10	1	0
Scall	NF_016-10	1	0
Scall	NF_017-10	1	0
Scall	NF_018-10	1	0
Scall	NF_019-10	1	0
Scall	NF_020-10	1	0
Scall	NF_022-10	1	0
Scall	NF_024-10	1	0
Scall	NF_025-10	1	0
Scall	NF_026-10	1	0
Scall	NF_027-10	1	0
Scall	NF_028-10	1	0
Scall	NF_029-10	1	0
Scall	NF_031-10	1	0
Scall	NF_033-10	1	0
Scall	NF_034-11	1	0
Scall	NF_036-11	1	0
Scall	NF_037-11	1	0
Scall	NF_038-11	1	0
Scall	NF_039-11	1	0
Scall	NF_040-11	0.996	0.004
Scall	NF_041-11	1	0
Scall	NF_042-11	1	0
Scall	NF_043-11	0.995	0.005
Scall	NF_044-11	1	0
Scall	NF_045-11	0.997	0.003
Scall	NF_046-11	0.983	0.017
Scall	NF_047-11	1	0
Scall	NF_048-11	0.999	0.001
Scall	NF_049-11	1	0
Scall	NF_050-11	1	0
Scall	NF_051-11	1	0
Scall	NF_053-11	1	0
Scall	NF_054-11	1	0
Scall	NF_055-11	1	0
Scall	NF_058-11	1	0
Scall	NF_059-11	1	0
Scall	NF_064-11	0.998	0.002
Scall	NF_065-11	0.985	0.015
Scall	NF_066-11	0.995	0.005
Scall	NF_067-11	1	0
Scall	NF_071-11	0.994	0.006
Scall	NF_075-11	1	0
Scall	NF_076-11	0.997	0.003
Scall	NF_078-11	1	0
Scall	NF_080-12	0.992	0.008
Scall	NF_082-12	1	0
Scall	NF_083-12	1	0
Scall	NF_084-12	1	0
Scall	NF_085-13	0.999	0.001
Scall	NF_086-13	1	0
Scall	NF_088-13	1	0
Scall	NF_089-13	0.998	0.002
Scall	NF_091-13	0.994	0.006
Scall	NF_093-13	0.977	0.023
Scall	NF_094-13	0.997	0.003
Scall	NF_095-13	1	0
Scall	NF_131-15	1	0
Scall	NF_132-15	1	0
Scall	NF_133-15	1	0
Scall	NF_134-15	0.999	0.001
Scall	NF_135-15	1	0
Scall	NF_136-15	1	0
Scall	NF_137-15	1	0
Scall	NF_138-15	1	0
Scall	NF_139-15	1	0
Scall	NF_142-16	1	0
Scall	NF_143-16	1	0
Scall	NF_144-16	1	0
Scall	NF_145-16	1	0
Scall	NF_147-16	1	0
Scall	NF_148-16	1	0
Scall	NF_149-16	1	0
Scall	NF_150-16	1	0
Scall	NF_188-15	1	0
Scall	NF_189-15	0.991	0.009
Scall	NF_190-16	1	0
Scall	NF_193-16	1	0
Scall	NF_194-16	1	0
Scall	NF_195-16	1	0
Scall	NF_207-16	1	0
Scall	NF_208-17	1	0
Scall	NF_209-17	1	0
Scall	NF_210-17	1	0
Scall	NF_211-17	1	0
Scall	NF_214-17	1	0
Scall	NF_216-17	1	0
Scall	NF_217-17	1	0
Scall	NF_218-17	1	0
Scall	PC_001-14	1	0
Scall	PC_002-14	1	0
Scall	PC_003-14	1	0
Scall	PC_004-14	1	0
Scall	PC_005-14	0.999	0.001
Scall	PC_006-14	1	0
Scall	PC_007-14	0.999	0.001
Scall	PC_009-14	1	0
Scall	PC_010-14	1	0
Scall	PC_011-14	1	0
Scall	PC_012-14	1	0
Scall	PC_013-14	1	0
Scall	PC_014-14	0.998	0.002
Scall	PC_015-14	1	0
Scall	PC_017-14	1	0
Scall	PC_018-14	1	0
Scall	PC_020-14	1	0
Scall	PC_021-14	1	0
Scall	PC_022-14	1	0
Scall	PC_023-14	1	0
Scall	PC_025-14	1	0
Scall	PC_026-14	1	0
Scall	PC_027-14	1	0
Scall	PC_028-14	1	0
Scall	PC_029-14	1	0
Scall	PC_030-14	1	0
Scall	PC_031-14	1	0
Scall	PC_032-14	1	0
Scall	PC_033-14	1	0
Scall	PC_035-14	1	0
Scall	PC_036-14	1	0
Scall	PC_037-14	1	0
Scall	PC_038-14	1	0
Scall	PC_039-14	1	0
Scall	PC_040-14	1	0
Scall	PC_041-14	1	0
Scall	PC_042-14	1	0
Scall	PC_043-14	1	0
Scall	PC_062-15	1	0
Scall	PC_066-15	1	0
Scall	PC_068-15	1	0
Scall	PC_076-15	1	0
Scall	PC_077-15	1	0
Scall	PC_078-15	1	0
Scall	PC_079-15	1	0
Scall	PC_080-15	1	0
Scall	PC_081-15	1	0
Scall	PC_082-15	1	0
Scall	PC_083-15	1	0
Scall	PC_084-15	1	0
Scall	PC_085-15	1	0
Scall	PC_086-15	1	0
Scall	PC_087-15	1	0
Scall	PC_088-15	1	0
Scall	PC_089-15	1	0
Scall	PC_090-15	1	0
Scall	PC_091-15	0.999	0.001
Scall	PC_092-15	1	0
Scall	PC_093-15	1	0
Scall	PC_094-15	1	0
Scall	PC_095-15	1	0
Scall	PC_096-15	1	0
Scall	PC_097-15	1	0
Scall	PC_098-15	1	0
Scall	PC_099-15	1	0
Scall	PC_100-15	0.952	0.048
Scall	PC_101-16	1	0
Scall	PC_102-16	1	0
Scall	PC_103-16	1	0
Scall	PC_104-16	1	0
Scall	PC_105-16	1	0
Scall	PC_106-16	1	0
Scall	PC_107-16	1	0
Scall	PC_108-16	1	0
Scall	PC_109-16	1	0
Scall	PC_110-16	1	0
Scall	PC_111-16	1	0
Scall	PC_112-16	1	0
Scall	PC_113-16	1	0
Scall	PC_115-16	1	0
Scall	PC_116-16	1	0
Scall	PC_117-16	1	0
Scall	PC_118-16	1	0
Scall	PC_119-16	1	0
Scall	PC_120-16	1	0
Scall	PC_121-16_rep	1	0
Scall	PC_122-16	1	0
Scall	SC_004-12	1	0
Scall	SC_005-12	1	0
Scall	SC_016-12	0.999	0.001
Scall	SC_028-12	1	0
Scall	SC_031-13	1	0
Scall	SC_034-13	1	0
Scall	SC_036-13	1	0
Scall	SC_037-13	0.998	0.002
Scall	SC_038-13	0.999	0.001
Scall	SC_040-13	0.992	0.008
Scall	SC_041-13	0.983	0.017
Scall	SC_042-13	1	0
Scall	SC_046-13	1	0
Scall	SC_047-13	1	0
Scall	SC_048-13	1	0
Scall	SC_049-13	1	0
Scall	SC_053-13	0.999	0.001
Scall	SC_054-13	0.998	0.002
Scall	SC_056-13	1	0
Scall	SC_058-13	1	0
Scall	SC_061-13	1	0
Scall	SC_062-13	0.996	0.004
Scall	SC_080-13	1	0
Scall	SC_083-13	0.993	0.007
Scall	SC_084-13	1	0
Scall	SC_087-13	1	0
Scall	SC_090-13	0.997	0.003
Scall	SC_260-16	0.996	0.004
Scall	SC_276-16	0.999	0.001
Scall	SC_279-16	1	0
Scall	SC_281-16	1	0
Scall	SC_288-16	1	0
Scall	SC_292-16	1	0
Scall	SC_293-16	1	0
Scall	SC_299-16	1	0
Scall	SC_304-16	1	0
Scall	SC_306-16	1	0
Scall	SC_308-16	1	0
Scall	SC_310-16	1	0
Scall	SC_311-16	1	0
Scall	SC_313-16	1	0
Scall	SC_315-16	1	0
Scall	SC_324-16	1	0
Scall	SC_329-17	1	0
Scall	SC_331-17	1	0
Scall	TX_005-12	0.982	0.018
Scall	TX_007-12	1	0
Scall	TX_010-13	1	0
Scall	TX_012-14	1	0
Scall	TX_013-14	1	0
Scall	TX_014-14	1	0
Scall	TX_017-14	1	0
Scall	TX_018-14	1	0
Scall	TX_019-14	1	0
Scall	TX_020-14	1	0
Scall	TX_021-14	1	0
Scall	TX_022-14	1	0
Scall	TX_023-14	1	0
Scall	TX_024-14	0.999	0.001
Scall	TX_025-14	1	0
Scall	TX_026-14	1	0
Scall	TX_027-14	1	0
Scall	TX_028-14	1	0
Scall	TX_029-14	1	0
Scall	TX_030-14	1	0
Scall	TX_031-14	1	0
Scall	TX_032-15	0.998	0.002
Scall	TX_033-XX	1	0
Scall	TX_034-15	1	0
Scall	TX_035-15	0.987	0.013
Scall	TX_036-15	0.996	0.004
Scall	TX_039-15	1	0
Scall	TX_040-15	1	0
Scall	TX_043-16_rep	0.999	0.001
Scall	TX_050-17	1	0
Scall	TX_051-17	1	0
Scall	TX_052-17	1	0
Scall	TX_053-17	1	0
Scall	TX_054-17	1	0
Scall	TX_056-17	1	0
Scall	TX_057-17	1	0
Scall	TX_058-17	1	0
Scall	TX_059-16	1	0
Scall	TX_060-16	1	0
Scall	TX_061-16	1	0
Scall	TX_062-16	1	0
Scall	TX_063-16	1	0
Scall	TX_064-16	1	0
Scall	TX_065-16	1	0
Scall	TX_066-16	1	0
Scall	TX_067-16	1	0
Scall	TX_068-16	0.966	0.034
Scall	TX_069-16	1	0
Scall	TX_070-17	1	0
Scall	WF_001-16	1	0
Scall	WF_002-16	1	0
Scall	WF_003-16	1	0
Scall	CC_126-14	0.897	0.103
Scall_BX	CC_008-12	0.909	0.091
Scall_BX	CC_024-12	0.942	0.058
Scall_BX	CC_035-12	0.879	0.121
Scall_BX	GA_036-16	0.811	0.189
Scall_BX	GA_047-16	0.7456	0.2544
Scall_BX	SC_032-13	0.754	0.246
Scall_BX	SC_039-13	0.66	0.34
Scall_BX	SC_043-13	0.933	0.067
Scall_BX	SC_051-13	0.803	0.197
Scall_BX	SC_057-13	0.714	0.286
Scall_BX	SC_063-13	0.716	0.284
Scall_BX	SC_066-13	0.715	0.285
Scall_BX	SC_071-13	0.875	0.125
Scall_BX	SC_075-13	0.741	0.259
Scall_BX	SC_309-16	0.715	0.285
Scall_BX	SC_334-17	0.7542	0.2458
F1	CC_015-12	0.502	0.498
F1	CC_031-12	0.503	0.497
F1	CC_084-13	0.543	0.457
F1	GA_059-17	0.503	0.497
F1	SC_012-12	0.502	0.498
F1	SC_017-12	0.441	0.559
F1	SC_064-13_rep	0.498	0.502
F1	SC_078-13	0.499	0.501
F1	SC_089-13_rep	0.497	0.503
F1	SC_332-17	0.505	0.495
Car_BX	CC_098-XX	0.294	0.706
Car	CC_094-13	0.042	0.958
Car	CC_033-12	0	1
Car	CC_075-13	0.005	0.995
Car	CC_081-13	0.023	0.977
Car	CC_097-XX	0.005	0.995
Car	CC_099-XX	0.012	0.988
Car	CC_160-14	0	1
Car	CC_184-14	0	1
Car	CC_287-16	0	1
Car	CC_289-16	0	1
Car	CC_290-16	0	1
Car	CC_291-16	0	1
Car	CC_293-16	0	1
Car	CC_294-16	0.008	0.992
Car	CC_296-16	0.002	0.998
Car	GA_002-14	0.004	0.996
Car	GA_006-15	0	1
Car	GA_027-16	0	1
Car	GA_030-16	0	1
Car	GA_033-16	0	1
Car	GA_034-16	0	1
Car	GA_035-16	0	1
Car	GA_037-16	0	1
Car	GA_040-16	0	1
Car	GA_042-16	0	1
Car	GA_046-16	0	1
Car	GA_052-17	0	1
Car	GA_055-17	0	1
Car	GA_056-17	0.003	0.997
Car	NC_003-15	0	1
Car	NC_004-15	0.002	0.998
Car	NC_005-15	0	1
Car	NC_007-15	0.024	0.976
Car	NF_212-17	0	1
Car	NF_213-17	0	1
Car	SC_001-12_rep	0	1
Car	SC_002-12	0	1
Car	SC_003-12	0	1
Car	SC_006-12	0	1
Car	SC_007-12	0	1
Car	SC_008-12	0	1
Car	SC_009-12	0.001	0.999
Car	SC_011-12	0.001	0.999
Car	SC_013-12	0	1
Car	SC_014-12	0	1
Car	SC_015-12	0	1
Car	SC_018-12	0	1
Car	SC_019-12	0	1
Car	SC_020-12	0	1
Car	SC_021-12	0	1
Car	SC_022-12	0	1
Car	SC_023-12	0	1
Car	SC_024-12	0	1
Car	SC_025-12	0	1
Car	SC_026-12	0	1
Car	SC_029-12	0	1
Car	SC_030-13	0	1
Car	SC_044-13	0.001	0.999
Car	SC_045-13	0.029	0.971
Car	SC_050-13	0.006	0.994
Car	SC_052-13	0.011	0.989
Car	SC_059-13	0	1
Car	SC_060-13	0	1
Car	SC_069-13	0.012	0.988
Car	SC_070-13	0.013	0.987
Car	SC_074-13	0.009	0.991
Car	SC_076-13	0.041	0.959
Car	SC_077-13	0.051	0.949
Car	SC_079-13	0.004	0.996
Car	SC_081-13	0.01	0.99
Car	SC_082-13	0.005	0.995
Car	SC_157-14	0.007	0.993
Car	SC_258-16	0	1
Car	SC_266-16	0.001	0.999
Car	SC_268-16	0.005	0.995
Car	SC_270-16	0.002	0.998
Car	SC_273-16	0	1
Car	SC_285-16	0	1
Car	SC_286-16	0.005	0.995
Car	SC_305-16	0	1
Car	SC_312-16	0	1
Car	SC_314-16	0.017	0.983
Car	SC_316-16	0	1
Car	SC_317-16	0	1
Car	SC_318-16	0	1
Car	SC_319-16	0	1
Car	SC_320-16	0	1
Car	SC_322-16	0	1
Car	SC_327-17	0	1
Car	SC_330-17	0	1
